# Supplementary material for: Intimately mixed copper, cobalt, and iron fluorides resulting from the insertion of fluorine into a LDH template
Source: Royal Society of Chemistry journal article supplement (doi:10.1039/d4dt00504j), 2024-01-01
Supplement: d4dt00504j1.pdf [file d4dt00504j1.pdf]

## **Intimately mixed copper, cobalt, and iron fluorides resulting from the insertion of fluorine into a LDH template**

Abderraouf Rouag<sup>a</sup>, Régis Porhiel<sup>a</sup>, Kevin Lemoine<sup>a</sup>, Fabrice Leroux<sup>a</sup>, Jean-Marc Grenèche<sup>b</sup>,

Diane Delbègue<sup>c</sup>, Cristina Iojoiu<sup>d</sup>, Katia Guérin<sup>\*a</sup>

- a. Université Clermont Auvergne, INP Clermont, CNRS, ICCF, 24, Avenue Blaise Pascal, 63178 Aubière, France.
- b. Institut des Molécules et des Matériaux du Mans, UMR 6283 CNRS, Le Mans Université, Avenue Olivier Messiaen, 72085 Le Mans Cedex 9, France.
- c. Centre National des Etudes Spatiales, 18 avenue Edouard Belin 31 401 Toulouse Cedex 9, France.
- d. Laboratoire d'Electrochimie et de Physicochimie des Matériaux et des Interfaces, UMR 5631 CNRS/INPG/UJF, 138402 Saint Martin d'Hères Cedex, France

## Supplementary Information

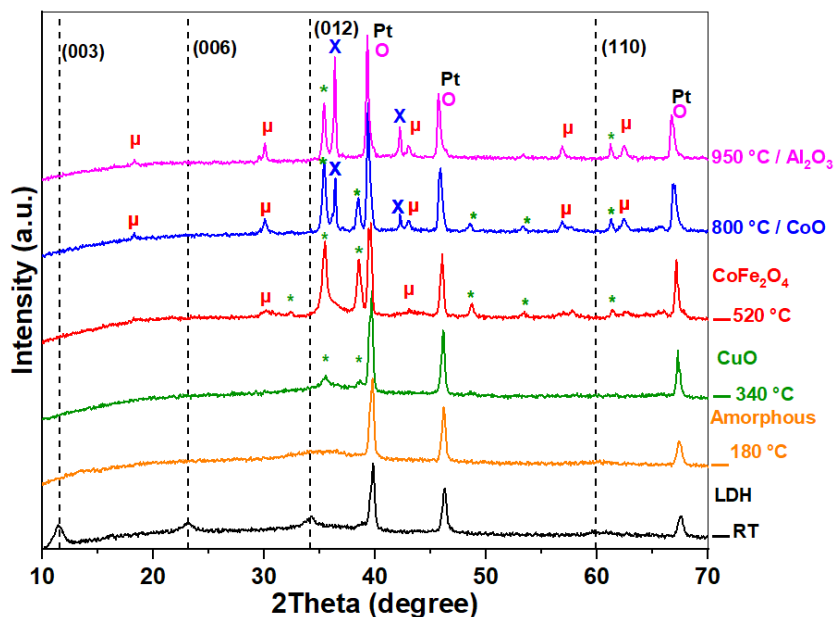

**Fig. S1** Phase identification in diffractograms across critical temperatures.

\* CuO (96-901-6823),  $\mu$  CoFe<sub>2</sub>O<sub>4</sub> (96-153-3163),  
 x CoO(96-900-8619), and o Al<sub>2</sub>O<sub>3</sub> (96-154-1583)

**Table S1** Detail of experimental composition calculations obtained by ICP-AES.

| Stoichiometric coefficients | Equations                                                                                      | Results |
|-----------------------------|------------------------------------------------------------------------------------------------|---------|
| x                           | $\frac{Cu (\%)}{Co (\%)} = \frac{(1-x)MCu}{xMCo} = 3.34$                                       | 0.24    |
| y                           | $\frac{Fe (\%)}{Al (\%)} = \frac{yMFe}{(1-y)MAl} = 5.32$                                       | 0.72    |
| n                           | $\frac{Cu (\%)}{M Cu} + \frac{Co (\%)}{M Co}$<br>$\frac{Al (\%)}{M Al} + \frac{Fe (\%)}{M Fe}$ | 2.03    |

|     |                                           |      |
|-----|-------------------------------------------|------|
| $z$ | $2n(1+x) + 2nx + 3(1-y) + 3y - 6 - z = 0$ | 1.07 |
|-----|-------------------------------------------|------|

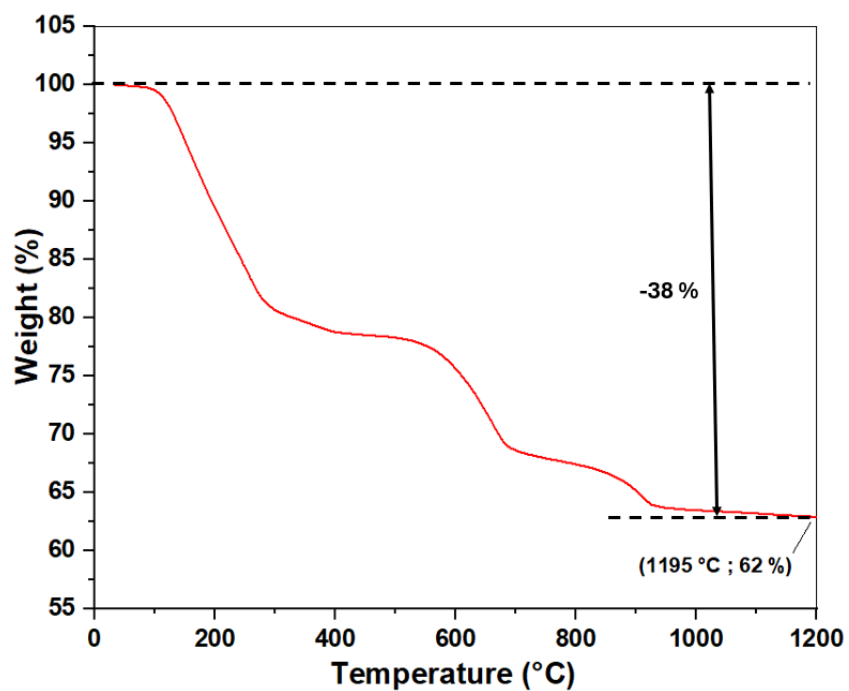

Fig. S2 Thermogravimetric analysis of LDH template under helium, temperature ramp from RT to 1200 °C at 10 °C/min.

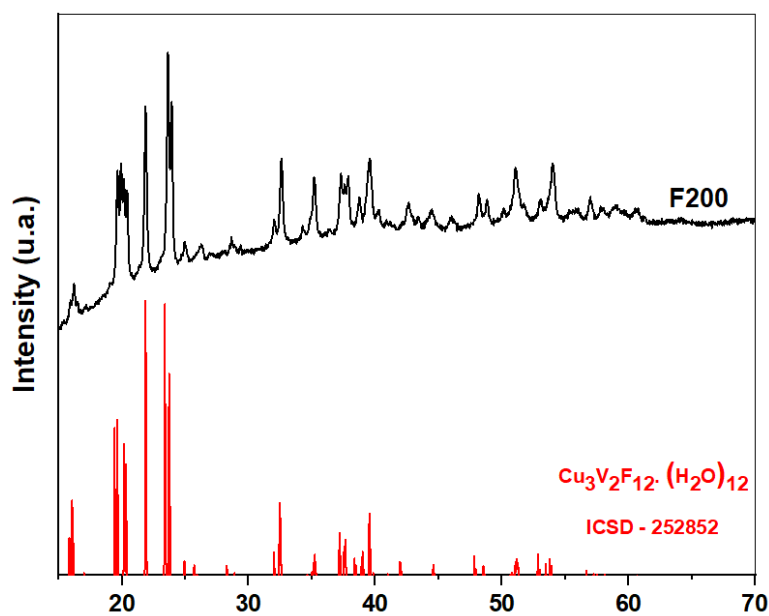

Fig. S3 Diffraction peak attributions of fluorinated LDH at 200°C (F200) after its exposure to air.

**Table S2** Compositions generated by semi-quantitative EDX analysis (% Atomic).

| <b>Elements</b>     | <b>Cu</b> | <b>Co</b> | <b>Al</b> | <b>Fe</b> | <b>Cl</b> | <b>F</b> |
|---------------------|-----------|-----------|-----------|-----------|-----------|----------|
| <b>LDH Template</b> | 8.2       | 1.03      | 2.19      | 3.9       | 1.13      | 0        |
| <b>F200</b>         | 12.6      | 1.83      | 2.4       | 5.17      | 0.2       | 31       |

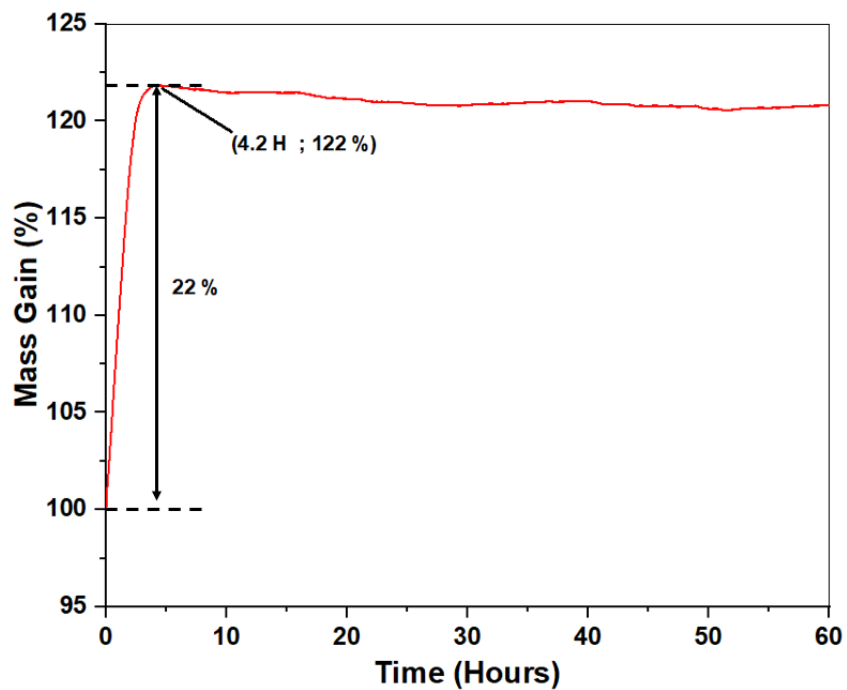

**Fig. S4** Thermogravimetric study of water uptake at 30°C Over 60 hours in freshly synthesized F200.

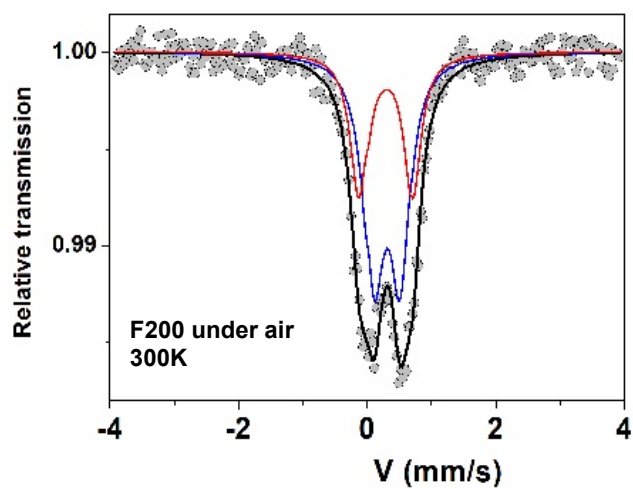

**Fig. S5** Mössbauer spectra at 300 K for F200 under air phase. Grey dots represent the experimental data, black lines the resulting fitted spectra

**Table. S3** Data collection, structural parameter and atomic positions of  $\text{Cu}_3\text{Fe}_{1.5}\text{Al}_{0.5}\text{F}_{12}\cdot(\text{H}_2\text{O})_{12}$ 

| Cell parameters             |             | Bond distances |             |             |                     |      |
|-----------------------------|-------------|----------------|-------------|-------------|---------------------|------|
| a (Å)                       | 7.4836(4)   | Atom i         | Atom j      |             | $d_{i,j}$ (Å)       |      |
| b (Å)                       | 7.5759(5)   | Cu1            | F1          | 2x          | 1.89(3)             |      |
| c (Å)                       | 8.1753(5)   |                | Ow2         | 2x          | 2.30(3)             |      |
| $\alpha$ (°)                | 88.826(5)   |                | Ow1         | 2x          | 2.38(3)             |      |
| $\beta$ (°)                 | 89.927(6)   | Cu2            | Ow3         | 2x          | 2.04(3)             |      |
| $\gamma$ (°)                | 87.934(6)   |                | F3          | 2x          | 2.13(3)             |      |
| V (Å <sup>3</sup> )         | 463.10(5)   |                | F3          | 2x          | 2.13(3)             |      |
| Z                           | 1           |                | Ow4         | 2x          | 2.19(3)             |      |
| $\rho$ (g/cm <sup>3</sup> ) | 2.538       | Cu3            | Ow5         | 2x          | 2.01(3)             |      |
| SG                          | <i>P</i> -1 |                | Ow6         | 2x          | 2.18(3)             |      |
| Symmetry                    | Triclinic   |                | F2          | 2x          | 2.22(3)             |      |
| $R_p/R_{wp}$                | 0.137/0.095 | Fe1 Al2        | F1          | 2x          | 2.05(3)             |      |
| $R_b/R_f$                   | 0.036/0.032 |                | F2          | 2x          | 2.11(3)             |      |
| $\chi^2$                    | 2.19        |                | F3          | 2x          | 2.31(3)             |      |
|                             |             | Fe2 Al1        | F5          | 2x          | 1.80(3)             |      |
|                             |             |                | F6          | 2x          | 1.94(3)             |      |
|                             |             |                | F4          | 2x          | 1.99(2)             |      |
| Atom                        | Wyck.       | X              | Y           | Z           | B(Å <sup>2</sup> )* | Occ. |
| Cu1                         | 1a          | 0              | 0           | 0           | 1.0                 | 1    |
| Cu2                         | 1g          | 0              | ½           | ½           | 1.0                 | 1    |
| Cu3                         | 1e          | ½              | ½           | 0           | 1.0                 | 1    |
| Fe1                         | 1c          | 0              | ½           | 0           | 1.0                 | 0.75 |
| Fe2                         | 1f          | ½              | 0           | ½           | 1.0                 | 0.75 |
| Al1                         | 1f          | ½              | 0           | ½           | 1.0                 | 0.25 |
| Al2                         | 1c          | 0              | ½           | 0           | 1.0                 | 0.25 |
| Ow1                         | 2i          | 0.1040(39)     | 0.0812(42)  | -0.2646(38) | 1.0                 | 1    |
| Ow2                         | 2i          | 0.2801(44)     | 0.0326(39)  | 0.1072(46)  | 1.0                 | 1    |
| Ow3                         | 2i          | 0.2575(38)     | 0.4587(37)  | 0.4242(39)  | 1.0                 | 1    |
| Ow4                         | 2i          | 0.0573(43)     | 0.7730(44)  | 0.5597(38)  | 1.0                 | 1    |
| Ow5                         | 2i          | 0.4068(47)     | 0.6022(42)  | -0.2140(40) | 1.0                 | 1    |
| Ow6                         | 2i          | 0.4787(44)     | 0.7573(41)  | 0.1148(37)  | 1.0                 | 1    |
| F1                          | 2i          | 0.9311(36)     | 0.2414(36)  | 0.0181(37)  | 1.0                 | 1    |
| F2                          | 2i          | 0.2444(37)     | 0.4234(35)  | 0.1127(31)  | 1.0                 | 1    |
| F3                          | 2i          | 0.1019(35)     | 0.4444(40)  | 0.7386(40)  | 1.0                 | 1    |
| F4                          | 2i          | 0.4583(42)     | 0.2510(34)  | 0.5623(30)  | 1.0                 | 1    |
| F5                          | 2i          | 0.5847(43)     | 0.0640(36)  | 0.3029(25)  | 1.0                 | 1    |
| F6                          | 2i          | 0.2618(40)     | -0.0098(32) | 0.4062(38)  | 1.0                 | 1    |

\*Atomic displacements were not refined and fixed at 1.0

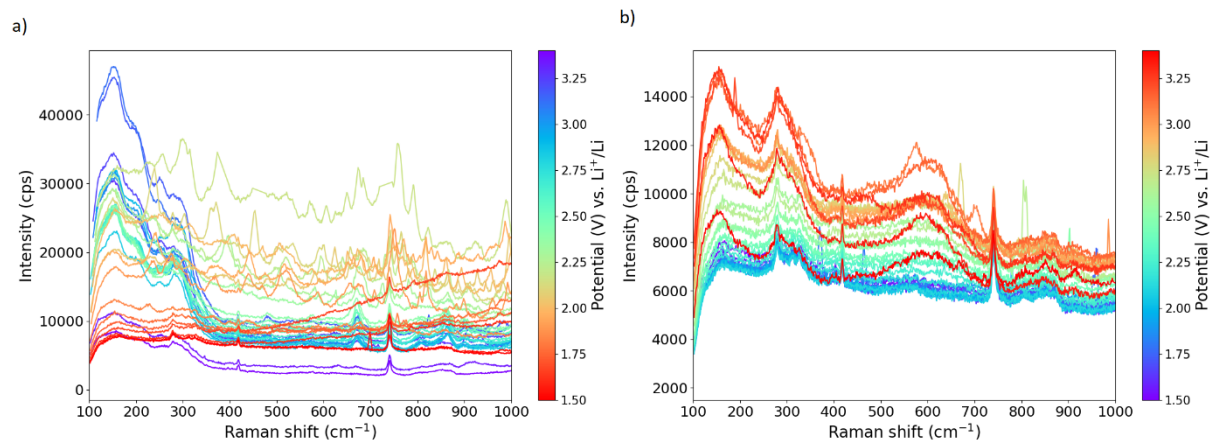

**Fig. S6** Raman *operando* of the fluorinated active material with 1M LiTFSI in TEGDME electrolyte, one scan out of 5 between: (a) 3.4V and 1.5 V vs. Li<sup>+</sup>/Li during electrochemical reduction; (b) 1.5 and 3.5 V vs. Li<sup>+</sup>/Li during electrochemical oxidation

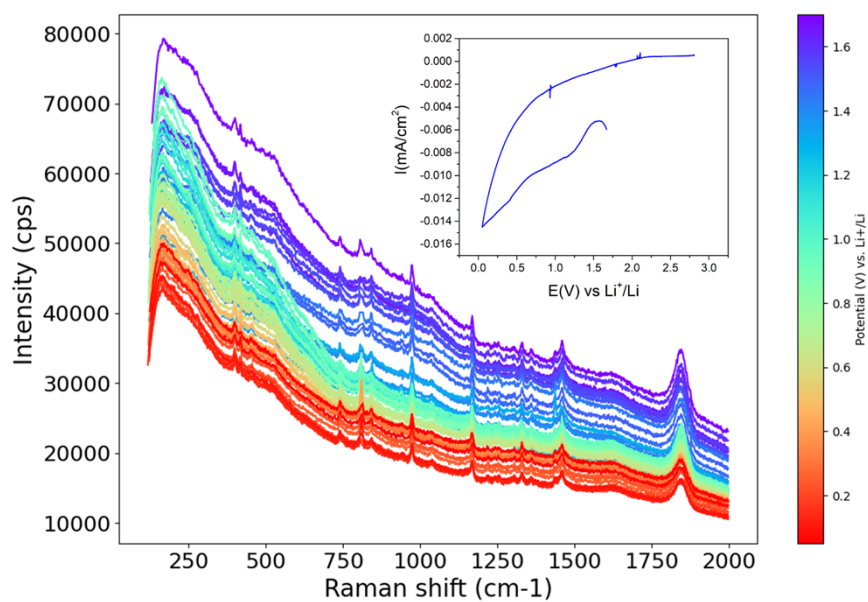

**Fig. S7** Raman *operando* of the 1M LiTFSI in TEGDME electrolyte on polypropylene Celgard separator and its voltammogram obtained at 0.03 mV.s<sup>-1</sup>
